# Supplementary material for: Low expression of neural cell adhesion molecule, CD56, is associated with low efficacy of bortezomib plus dexamethasone therapy in multiple myeloma
Source: PLoS One. 2018 May 8;13(5):e0196780. doi: 10.1371/journal.pone.0196780 (PMC5940221; doi:10.1371/journal.pone.0196780)
Supplement: S1 Table — Summary of clinical features and expression of NCAM in MM cells derived from 74 patients receiving Bd therapy. (XLSX) [file pone.0196780.s001.xlsx]

## Sheet: Sheet
S1 Table
	Age	Sex	B2MG	Alb	Prior PBSCT	Followed by PBSCT	IMIDs	Prior treatment (lines)	Karyotype abnormalities or related genes	M protein	Light chain	M protein level	Best response	PR or better	OS (months)	Dead	PFS (month)	PD or dead	NCAM-qPCR	NCAM-FACS
BD-01	60	m	13	1.7	1	0	0	3	NE	IgG	k	8447	VGPR	1	13.5	1	3.9	1	3.60224	5.9
BD-02	41	f	2.8	4.6	1	0	0	2	NE	BJP	l	8361	SD	0	26.3	1	3.3	1	1.39899	98.2
BD-03	63	f	5.3	3.1	1	0	1	3	NE	IgA	k	3213	VGPR	1	11.7	1	3.4	1	2.83225	3.7
BD-04	75	m	8.8	2.9	0	1	0	3	t(4;14) or FGFR3(+)	IgA	k	3920	SD	0	3	1	2.4	1	0.024044	92.3
BD-05	78	m	7.8	2.3	0	0	0	2	t(11;14) or CCND1(++)	IgG	l	5080	SD	0	1.6	1	1.2	1	0.014228	15.7
BD-06	75	m	3.8	3.7	0	0	0	2	NE	IgG	k	6755	PR	1	52.1	0	51.9	0	0.001572	49.9
BD-07	60	m	4.7	3.5	0	1	0	1	ND	IgG	k	4572	VGPR	1	34.1	0	2.7	0	32.1536	94.8
BD-08	77	m	5.3	3.2	0	0	0	1	NE	IgA	k	2171	PR	1	9.3	1	2.8	1	13.5642	72.4
BD-09	61	f	2.3	2.9	0	0	0	2	NE	IgG	k	7608	SD	0	69.3	1	14	1	0	20
BD-10	57	f	7.2	3.4	1	0	0	1	t(11;14) or CCND1(++)	IgG	l	6456	PR	1	10.9	1	1.6	1	0.053037	2.3
BD-11	61	f	6.9	4.7	1	0	0	3	NE	BJP	k	3832	VGPR	1	48.5	1	14.9	1	1.32049	17.4
BD-12	77	f	8.3	3.3	0	0	1	3	NE	IgA	k	4010	PR	1	5.7	1	3.7	1	149.614	88.9
BD-13	75	m	4.7	2.6	0	0	0	1	ND	IgG	k	7789	PR	1	31.1	0	13.2	1	207.549	99.6
BD-14	62	m	5.2	4	0	0	0	1	t(14;16) or cMAF(+)	IgG	k	5438	VGPR	1	50.5	1	30.7	1	0.00011	0.1
BD-15	83	f	14.3	3.2	0	0	0	2	t(4;14) or FGFR3(+)	IgA	l	2588	SD	0	3.9	1	3.9	1	48.7708	92.3
BD-16	74	m	8.8	3.7	0	0	1	2	ND	IgG	k	1939	PR	1	3	0	3	0	12.3854	60.9
BD-17	61	m	6.1	4.3	1	0	0	1	ND	IgG	k	3187	PR	1	22.1	1	19.7	0	0.115553	95.2
BD-18	66	f	2.1	4.3	1	0	1	2	ND	IgD	k	2350	PD	0	9.8	1	1.4	1	0.00118	1.6
BD-19	78	m	4.7	3.5	0	0	0	1	NE	IgG	k	5902	PR	1	61.4	0	15.2	1	0.745996	95.1
BD-20	84	m	7.1	2.9	0	0	1	3	t(14;16) or cMAF(+)	IgG	k	6413	SD	0	11	1	6.1	1	0.24109	0.5
BD-21	67	f	1.8	3.3	0	0	1	2	t(4;14) or FGFR3(+)	IgG	l	3618	PR	1	29.2	1	12.5	1	58.8672	92.4
BD-22	73	m	10.9	4.3	0	0	0	2	ND	BJP	l	1172	PR	1	4.8	1	1.6	1	0.000295	22.2
BD-23	61	f	2.2	4.2	1	0	0	1	NE	BJP	k	228	VGPR	1	10.5	1	5.7	1	8.14827	74.1
BD-24	75	m	11.3	3.2	0	0	0	3	t(4;14) or FGFR3(+)	IgA	l	3230	PR	1	5	1	1.8	1	34.2889	99.7
BD-25	35	m	4.8	4.5	1	0	0	1	ND	IgD	l	2260	VGPR	1	97.9	0	4.5	1	47.2448	0.4
BD-26	78	f	7.1	3.1	0	0	0	1	ND	IgG	k	6807	PR	1	9.9	0	7.4	1	31.1949	84
BD-27	58	f	2.2	4.2	0	0	0	1	t(14;16) or cMAF(+)	IgG	l	4800	PR	1	12.7	1	5.7	1	1.38e-06	1.3
BD-28	68	f	2.7	3.5	1	0	0	1	t(4;14) or FGFR3(+)	IgG	l	6313	VGPR	1	94.5	0	41.4	1	10.9667	96.6
BD-29	71	f	5.8	3.2	0	0	1	2	t(4;14) or FGFR3(+)	IgG	k	6229	PR	1	23.3	1	5.5	1	54.5055	95.1
BD-30	75	m	3.4	4.2	0	0	0	2	NE	IgG	k	2306	PR	1	58.3	1	22.6	1	0.335405	11.4
BD-31	71	f	2.9	4.3	0	0	0	2	ND	IgG	l	2768	PR	1	41.4	1	6.6	1	113.44	88
BD-32	56	m	1.9	4.1	1	0	0	1	t(4;14) or FGFR3(+)	IgG	k	2804	PR	1	81.8	1	13.1	1	36.8921	87.8
BD-33	42	m	52	3.6	0	0	0	1	ND	BJP	k	6873	VGPR	1	8.6	1	1.9	1	7.92274	98.3
BD-34	62	f	3.6	4.6	0	0	0	1	t(14;16) or cMAF(+)	BJP	l	322	CR	1	85.2	0	44.3	1	0.006957	3
BD-35	74	f	93.1	3.9	0	0	0	2	ND	IgG	k	1845	PR	1	2.4	1	2.3	1	20.9719	26.7
BD-36	68	m	3	3.9	1	0	1	3	t(11;14) or CCND1(++)	BJP	k	8938	CR	1	31.6	1	10.4	1	183.512	99.6
BD-37	79	f	3.2	2.8	0	0	0	1	t(4;14) or FGFR3(+)	IgG	l	5506	PR	1	33.5	1	14.5	1	186.362	98.8
BD-38	78	f	8.4	2.3	0	0	1	3	ND	IgD	k	9567	SD	0	1.1	1	0.8	1	0.01559	78
BD-39	65	f	4.6	2.3	0	0	1	3	t(4;14) or FGFR3(+)	IgG	l	4294	PD	0	10.7	1	4	1	75.71	84.3
BD-40	65	m	3	4.1	1	0	0	4	NE	IgA	l	911	VGPR	1	78.9	0	16	1	19.1343	88.4
BD-41	70	f	2.9	3.1	0	0	1	2	t(4;14) or FGFR3(+)	IgG	k	2442	SD	0	4.2	1	1.9	1	25.6063	95.2
BD-42	77	m	14.4	3.2	0	0	1	2	t(4;14) or FGFR3(+)	IgG	k	1776	PR	1	15.1	1	12.9	1	233.96	99.7
BD-43	36	m	8	3.9	1	0	0	1	ND	BJP	l	4918	VGPR	1	76.7	0	53	0	1.89026	23
BD-44	44	m	3.4	3.6	1	0	0	1	t(4;14) or FGFR3(+)	IgG	k	5568	PR	1	29.8	1	3.5	1	29.9709	73.8
BD-45	48	m	5.6	4.7	1	0	0	1	t(4;14) or FGFR3(+)	BJP	k	12325	CR	1	72.9	0	51.1	1	90.7392	99
BD-46	79	f	16.9	3.9	0	0	0	0	ND	BJP	k	3547	VGPR	1	42.9	1	7.7	1	36.2994	88.9
BD-47	74	m	12.9	4.9	0	0	0	0	t(11;14) or CCND1(++)	BJP	k	10074	VGPR	1	65.5	1	24.3	1	22.359	53.7
BD-48	75	f	15.9	4.4	0	0	0	0	t(11;14) or CCND1(++)	BJP	k	2450	SD	0	72.1	0	1.7	1	0.001207	1.2
BD-49	64	f	3.4	3.9	1	0	0	1	t(4;14) or FGFR3(+)	IgG	k	3556	CR	1	52.8	1	24.8	1	5.52779	91.8
BD-50	51	m	5.8	2.5	0	1	0	0	ND	IgG	l	6862	VGPR	1	67.6	0	3.8	1	0.000928	21
BD-51	64	f	6.3	3.6	1	0	1	2	t(4;14) or FGFR3(+)	BJP	k	3039	SD	0	16.2	1	9.8	1	9.42561	90.5
BD-52	52	m	12.7	2.4	0	1	0	0	ND	IgG	k	3851	PR	1	64.1	0	3.3	1	153.722	90.5
BD-53	67	f	3.1	3.2	0	0	1	4	t(4;14) or FGFR3(+)	IgG	k	5410	PR	1	21.3	1	7.8	1	82.1767	95.6
BD-54	49	f	4.9	3.3	1	0	0	1	t(11;14) or CCND1(++)	BJP	k	1628	SD	0	63.1	0	3.3	1	38.9188	72.3
BD-55	64	m	7.1	3.8	0	1	0	0	t(11;14) or CCND1(++)	BJP	k	7590	VGPR	1	41.4	1	3.6	1	0.000702	1.7
BD-56	77	f	3.5	3.5	0	0	0	1	t(14;16) or cMAF(+)	IgG	k	3979	PR	1	61.7	0	4.6	1	0.001136	3.8
BD-57	47	m	3.5	2.9	0	1	0	0	ND	IgG	k	5766	VGPR	1	10.1	0	4.1	0	102.749	99.4
BD-58	54	f	2.2	4	0	1	0	0	t(11;14) or CCND1(++)	BJP	k	2747	VGPR	1	59.2	0	3.5	1	75.227	86.2
BD-59	66	m	2.9	3.6	1	0	0	1	t(4;14) or FGFR3(+)	IgG	l	2000	PR	1	56.6	1	14	1	17.6852	92.6
BD-60	67	m	3.2	2.9	1	0	1	2	ND	IgA	l	1413	PD	0	20.1	1	0.6	1	4.10954	39.1
BD-61	80	m	4.8	3.7	0	0	1	4	t(11;14) or CCND1(++)	IgA	k	1711	VGPR	1	23.9	0	12.4	1	1.98e-05	3.8
BD-62	47	m	3.7	4.2	0	1	0	0	t(11;14) or CCND1(++)	IgD	l	5240	SD	0	33.3	1	2.8	1	54.1278	1.5
BD-63	47	m	2.5	3.1	0	0	0	0	t(11;14) or CCND1(++)	IgA	l	1404	SD	0	51.3	1	7.7	1	0.001482	4.8
BD-64	74	m	6.8	4	0	0	1	3	ND	IgA	l	1910	VGPR	1	57.9	0	12.1	1	0.002514	5.9
BD-65	63	m	3	2.8	0	0	0	0	ND	IgA	l	4950	PR	1	8.6	0	3.4	1	202.237	98.7
BD-66	63	f	4.3	2.5	0	0	0	0	ND	IgG	l	7992	PR	1	18.9	1	2.7	1	6.28019	69.5
BD-67	63	f	9.4	3.4	0	1	0	0	ND	IgA	l	5210	VGPR	1	54.7	0	2.3	1	27.5466	94.4
BD-68	46	f	4.3	3.4	0	1	0	0	t(14;16) or cMAF(+)	IgA	k	3334	VGPR	1	22.4	1	2.8	1	0.123418	5.5
BD-69	36	f	6.2	2.4	0	1	0	0	t(14;16) or cMAF(+)	IgG	k	8337	SD	0	53.2	0	3	1	0.000101	1.4
BD-70	63	m	13.2	2.6	1	0	0	0	t(11;14) or CCND1(++)	IgA	k	3880	VGPR	1	52.7	0	2.5	1	0.001692	2.5
BD-71	64	f	8.4	1.8	0	0	0	0	t(11;14) or CCND1(++)	BJP	k	651	SD	0	5.5	1	2.6	0	2.7705	45.4
BD-72	63	f	1.5	4.8	1	0	0	1	t(11;14) or CCND1(++)	BJP	k	549	VGPR	1	50.8	0	28.7	1	1455.93	90.6
BD-73	62	f	3.3	4.1	0	1	0	0	ND	IgG	l	3767	VGPR	1	43.4	1	2.4	1	0.064535	0.9
BD-74	58	m	2.3	3.7	0	1	0	0	ND	IgG	k	3440	PR	1	47.4	0	2.3	1	7547.52	79.6
